# Supplementary material for: Complete reperfusion is required for maximal benefits of mechanical thrombectomy in stroke patients
Source: PubMed Central journal article supplement (PMC5599658; doi:10.1038/s41598-017-11946-y), 2017-09-14
Supplement: 41598_2017_11946_MOESM1_ESM.pdf [file 41598_2017_11946_MOESM1_ESM.pdf]

## Supplementary material

### Title

Complete reperfusion is required for maximal benefits of mechanical thrombectomy in stroke patients

### Authors

Ángel Chamorro, MD, PhD<sup>1</sup>; Jordi Blasco, MD<sup>2</sup>; Antonio López, MD<sup>2</sup>; Sergio Amaro MD, PhD<sup>1</sup>; Luis San Román, MD, PhD<sup>2</sup>; Laura Llull MD, PhD<sup>1</sup>; Arturo Renú MD<sup>1</sup>; Salvatore Rudilosso, MD<sup>1</sup>; Carlos Laredo PhD.<sup>1</sup>; Victor Obach, MD.<sup>1</sup>; Xabier Urrea, MD, PhD<sup>1</sup>; Anna M. Planas PhD.<sup>3</sup>; Enrique C. Leira, MD, MS<sup>4</sup>; Juan Macho, MD, PhD<sup>2</sup>

### Supplemental Table I Main baseline traits of the patients excluded from the study

|                                                                            | <b>Patients included</b> | <b>Patients excluded</b> | <b>P value</b> |
|----------------------------------------------------------------------------|--------------------------|--------------------------|----------------|
| N                                                                          | 125                      | 222                      | -              |
| Baseline traits                                                            |                          |                          |                |
| Age yr, median                                                             | 70 (61-80)               | 72 (63-79)               | 0.995          |
| Males, %                                                                   | 53                       | 48                       | 0.366          |
| Hypertension,%                                                             | 51                       | 57                       | 0.290          |
| Diabetes, %                                                                | 16                       | 25                       | 0.050          |
| Dyslipemia,%                                                               | 38                       | 39                       | 0.815          |
| CAD, %                                                                     | 15                       | 19                       | 0.341          |
| Atrial fibrillation, %                                                     | 28                       | 34                       | 0.304          |
| Smoking, %                                                                 | 18                       | 22                       | 0.422          |
| Pretreatment NIHSS, median (IQR)                                           | 16 (13-20)               | 17 (13-21)               | 0.237          |
| NCCT ASPECTS >6, , median (IQR)                                            | 9 (8-10)                 | 9 (8-10)                 | 0.153          |
| ASPECTS=Alberta Stroke Program Early CT score; NCCT = Non contrast CT scan |                          |                          |                |
